# Supplementary material for: Antineutrophil Cytoplasmic Antibody Positivity Is Associated with Vascular Involvement in Behçet's Disease
Source: PubMed Central journal article supplement — Yonsei Med J. 2021 Jan 25;62(2):149–58. doi: 10.3349/ymj.2021.62.2.149 (PMC7859684; doi:10.3349/ymj.2021.62.2.149), 2021-01-25
Supplement: ymj-62-149-s001.pdf [file ymj-62-149-s001.pdf]

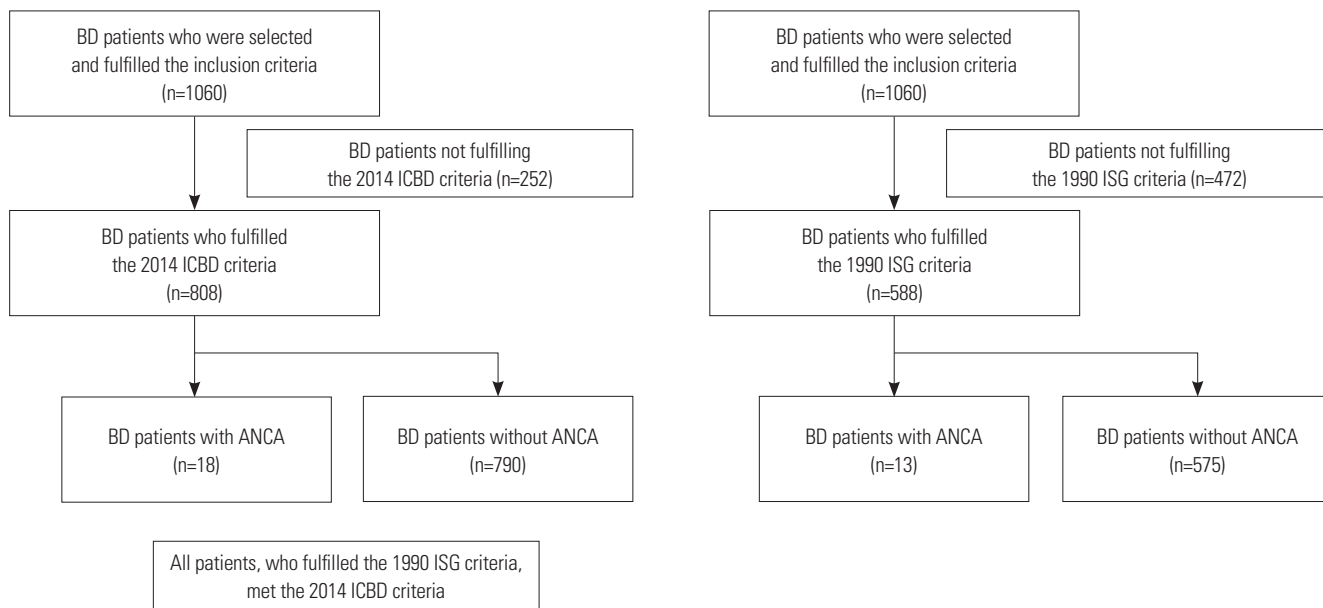

**Supplementary Fig. 1.** Algorithm for selecting the study population. A list of 1060 patients with BD as the primary diagnosis was collected by the clinical data repository of Severance Hospital. When the revised version of the ICB in 2014 (the 2014 ICB criteria) was applied, 252 patients were excluded from this study. When The ISG criteria in 1990 (the 1990 ISG criteria) were applied, 472 patients were excluded from this study. Finally, 808 of 1060 BD patients could be reclassified as BD based on the 2014 ICB criteria. In addition, 588 of 1060 BD patients could be reclassified as BD based on the 1990 ISG criteria. BD, Behçet's disease, ICB, International Criteria for Behçet's Disease; ISG, International Study Group; ANCA, antineutrophil cytoplasmic antibody.
