# Supplementary material for: Antineutrophil Cytoplasmic Antibody Positivity Is Associated with Vascular Involvement in Behçet's Disease
Source: PubMed Central journal article supplement — Yonsei Med J. 2021 Jan 25;62(2):149–58. doi: 10.3349/ymj.2021.62.2.149 (PMC7859684; doi:10.3349/ymj.2021.62.2.149), 2021-01-25
Supplement: ymj-62-149-s002.pdf [file ymj-62-149-s002.pdf]

**Supplementary Table 1.** Application of the 2007 EMA Algorithm for AAV and cPAN Based on the 2012 CHCC Definitions to 18 BD Patients with ANCA

| Patients number | ANCA positivity | ACR for EGPA | ACR for GPA | Histology compatible with CHCC MPA and GPA surrogate markers | No histology GPA surrogate markers and PR3-or MPO-ANCA positivity | Clinical and histologic evidence of small-vessel vasculitis<br>No GPA surrogate markers | No histology No GPA surrogate markers PR3- or MPO-ANCA positivity and renal vasculitis | Histology compatible with CHCC cPAN or typical angiographic features of cPAN | Not compatible with AAV or cPAN |
|-----------------|-----------------|--------------|-------------|--------------------------------------------------------------|-------------------------------------------------------------------|-----------------------------------------------------------------------------------------|----------------------------------------------------------------------------------------|------------------------------------------------------------------------------|---------------------------------|
|                 | Reclassified as | EGPA         | GPA         | GPA                                                          | GPA                                                               | GPA                                                                                     | MPA                                                                                    | cPAN                                                                         | Unclassified*                   |
| 1               | MPO(P)-ANCA     | No           | No          | No                                                           | No                                                                | No                                                                                      | No                                                                                     | No                                                                           | Yes                             |
| 2               | MPO(P)-ANCA     | No           | No          | No                                                           | No                                                                | No                                                                                      | No                                                                                     | No                                                                           | Yes                             |
| 3 <sup>†</sup>  | MPO(P)-ANCA     | No           | No          | No                                                           | No                                                                | No                                                                                      | No                                                                                     | No                                                                           | Yes                             |
| 4               | MPO(P)-ANCA     | No           | No          | No                                                           | No                                                                | No                                                                                      | No                                                                                     | No                                                                           | Yes                             |
| 5               | MPO(P)-ANCA     | No           | No          | No                                                           | No                                                                | No                                                                                      | No                                                                                     | No                                                                           | Yes                             |
| 6 <sup>†</sup>  | PR3(C)-ANCA     | No           | No          | No                                                           | No                                                                | No                                                                                      | No                                                                                     | No                                                                           | Yes                             |
| 7 <sup>†</sup>  | MPO(P)-ANCA     | No           | No          | No                                                           | No                                                                | No                                                                                      | No                                                                                     | No                                                                           | Yes                             |
| 8               | PR3(C)-ANCA     | No           | No          | No                                                           | No                                                                | No                                                                                      | No                                                                                     | No                                                                           | Yes                             |
| 9               | PR3(C)-ANCA     | No           | No          | No                                                           | No                                                                | No                                                                                      | No                                                                                     | No                                                                           | Yes                             |
| 10 <sup>†</sup> | MPO(P)-ANCA     | No           | No          | No                                                           | No                                                                | No                                                                                      | No                                                                                     | No                                                                           | Yes                             |
| 11              | MPO(P)-ANCA     | No           | No          | No                                                           | No                                                                | No                                                                                      | No                                                                                     | No                                                                           | Yes                             |
| 12              | MPO(P)-ANCA     | No           | No          | No                                                           | No                                                                | No                                                                                      | No                                                                                     | No                                                                           | Yes                             |
| 13              | MPO(P)-ANCA     | No           | No          | No                                                           | No                                                                | No                                                                                      | No                                                                                     | No                                                                           | Yes                             |
| 14 <sup>†</sup> | MPO(P)-ANCA     | No           | No          | No                                                           | No                                                                | No                                                                                      | No                                                                                     | No                                                                           | Yes                             |
| 15              | MPO(P)-ANCA     | No           | No          | No                                                           | No                                                                | No                                                                                      | No                                                                                     | No                                                                           | Yes                             |
| 16              | PR3(C)-ANCA     | No           | No          | No                                                           | No                                                                | No                                                                                      | No                                                                                     | No                                                                           | Yes                             |
| 17              | PR3(C)-ANCA     | No           | No          | No                                                           | No                                                                | No                                                                                      | No                                                                                     | No                                                                           | Yes                             |
| 18              | PR3(C)-ANCA     | No           | No          | No                                                           | No                                                                | No                                                                                      | No                                                                                     | No                                                                           | Yes                             |

EMA, European Medicine Agency; AAV, antineutrophil cytoplasmic antibody (ANCA)-associated vasculitis; cPAN, classic polyarteritis nodosa; CHCC, Chapel Hill Consensus Conference; ANCA, antineutrophil cytoplasmic antibody; ACR, American College of Rheumatology; EGPA, eosinophilic granulomatosis with polyangiitis; GPA, granulomatosis with polyangiitis; MPA, microscopic polyangiitis; PR3, proteinase 3; MPO, myeloperoxidase.

\*Since eighteen patients met the International study group (1990) and the International criteria for Behçet's disease (2014) criteria for Behçet's disease, all patients should be classified as Behçet's disease rather than unclassified vasculitis, <sup>†</sup>These five patients did not satisfy the ISG (1990) criteria, but only satisfy the ICB (2014) criteria.
