# Supplementary material for: Antineutrophil Cytoplasmic Antibody Positivity Is Associated with Vascular Involvement in Behçet's Disease
Source: PubMed Central journal article supplement — Yonsei Med J. 2021 Jan 25;62(2):149–58. doi: 10.3349/ymj.2021.62.2.149 (PMC7859684; doi:10.3349/ymj.2021.62.2.149), 2021-01-25
Supplement: ymj-62-149-s003.pdf [file ymj-62-149-s003.pdf]

**Supplementary Table 2.** Characteristics of 588 BD Patients Based on the 1990 ISG Criteria

| Variables                                     | Values      |
|-----------------------------------------------|-------------|
| At diagnosis                                  |             |
| Demographic data                              |             |
| Age at diagnosis (yr)                         | 39.0 (15.0) |
| Male sex                                      | 172 (29.3)  |
| ANCA positivity at diagnosis                  |             |
| MPO-ANCA (or P-ANCA)                          | 8 (1.4)     |
| PR3-ANCA (or C-ANCA)                          | 5 (0.9)     |
| MPO-ANCA (or P-ANCA) and PR3-ANCA (or C-ANCA) | 0 (0)       |
| ANCA negative                                 | 575 (97.8)  |
| Clinical manifestation at diagnosis           |             |
| Oral ulcer                                    | 588 (100)   |
| Genital ulcer                                 | 498 (84.7)  |
| Ocular manifestation                          | 299 (50.9)  |
| Skin manifestation                            | 530 (90.1)  |
| Neurologic manifestation                      | 38 (6.5)    |
| Vascular manifestation                        | 26 (4.4)    |
| Pathergy test positivity                      | 11 (1.9)    |
| Comorbidities at diagnosis                    |             |
| Diabetes mellitus                             | 53 (9.0)    |
| Hypertension                                  | 85 (14.5)   |
| Dyslipidemia                                  | 83 (14.1)   |
| Aortic valve replacement                      | 5 (0.9)     |
| Percutaneous coronary intervention            | 10 (1.7)    |
| Other vascular Intervention                   | 11 (1.9)    |
| During follow-up                              |             |
| Poor outcomes during follow-up                |             |
| All-cause mortality                           | 2 (0.3)     |
| CVA                                           | 27 (4.6)    |
| ACS                                           | 25 (4.3)    |
| DVT                                           | 21 (3.6)    |
| GI involvement                                | 76 (12.9)   |
| Ocular involvement                            | 37 (6.3)    |
| Medications administered during follow-up     |             |
| Glucocorticoid                                | 471 (80.1)  |
| Colchicine                                    | 454 (77.2)  |
| Azathioprine                                  | 144 (24.5)  |
| Methotrexate                                  | 33 (5.6)    |
| Cyclosporine                                  | 21 (3.6)    |
| TNF- $\alpha$ blockade                        | 9 (1.5)     |

BD, Behçet's disease; ISG, International Study Group; ANCA, antineutrophil cytoplasmic antibody; MPO, myeloperoxidase; P, perinuclear; PR3, proteinase 3; C, cytoplasmic; CVA, cerebrovascular accident; ACS, acute coronary syndrome; DVT, deep vein thrombosis; GI, gastrointestinal; TNF, tumor necrosis factor.

Values are expressed as a median (interquartile range, IQR) and number (percentage).
