# Supplementary material for: Antineutrophil Cytoplasmic Antibody Positivity Is Associated with Vascular Involvement in Behçet's Disease
Source: PubMed Central journal article supplement — Yonsei Med J. 2021 Jan 25;62(2):149–58. doi: 10.3349/ymj.2021.62.2.149 (PMC7859684; doi:10.3349/ymj.2021.62.2.149), 2021-01-25
Supplement: ymj-62-149-s004.pdf [file ymj-62-149-s004.pdf]

**Supplementary Table 3.** Comparison of the Sites and Pattern of Vascular Manifestation at Diagnosis between ANCA-Positive and ANCA-Negative BD Patients Based on the 1990 ISG Criteria

| <b>Vascular manifestation</b>                                              | <b>Total<br/>(n=588)</b> | <b>ANCA-positive BD<br/>patients (n=13)</b> | <b>ANCA-negative BD<br/>patients (n=575)</b> | <b>p value</b> |
|----------------------------------------------------------------------------|--------------------------|---------------------------------------------|----------------------------------------------|----------------|
| Lower extremity vein thrombosis                                            |                          |                                             |                                              |                |
| Deep vein                                                                  | 6 (1.0)                  | 0 (0)                                       | 6 (1.0)                                      | 1.000          |
| Superficial vein                                                           | 5 (0.9)                  | 0 (0)                                       | 5 (0.9)                                      | 1.000          |
| Vena cava thrombosis                                                       |                          |                                             |                                              |                |
| Inferior vena cava                                                         | 0 (0)                    | 0 (0)                                       | 0 (0)                                        | N/A            |
| Superior vena cava                                                         | 0 (0)                    | 0 (0)                                       | 0 (0)                                        | N/A            |
| Cerebral venous sinus thrombosis                                           | 0 (0)                    | 0 (0)                                       | 0 (0)                                        | N/A            |
| Pulmonary artery involvement                                               | 2 (0.3)                  | 0 (0)                                       | 2 (0.3)                                      | 1.000          |
| Intracardiac thrombosis                                                    | 2 (0.3)                  | 1 (7.7)                                     | 1 (0.2)                                      | 0.044          |
| Aorta involvement                                                          |                          |                                             |                                              |                |
| Aortic aneurysm                                                            | 3 (0.5)                  | 0 (0)                                       | 3 (0.5)                                      | 1.000          |
| Carotid artery aneurysm                                                    | 2 (0.3)                  | 0 (0)                                       | 2 (0.3)                                      | 1.000          |
| Extra-pulmonary artery involvement                                         |                          |                                             |                                              |                |
| Lower extremity artery                                                     | 7 (1.2)                  | 1 (7.7)                                     | 6 (1.0)                                      | 0.146          |
| Upper extremity artery                                                     | 2 (0.3)                  | 1 (7.7)                                     | 1 (0.2)                                      | 0.044          |
| Visceral artery                                                            | 1 (0.2)                  | 1 (7.7)                                     | 0 (0)                                        | 0.022          |
| Comments                                                                   | N=26, E=30               | N=3, E=4                                    | N=23, E=26                                   |                |
| Number of patients with vascular manifestation (N) and vascular events (E) |                          |                                             |                                              |                |

BD, Behçet's disease; ANCA, antineutrophil cytoplasmic antibody; ISG, International Study Group; E, event. Values are expressed as number (percentage).
